1           **Neck motor unit activity displays neural signatures of**  
2           **temporal control during sequential saccade planning**

3  
4                   **Debaleena Basu<sup>1</sup>, Naveen Sendhilnathan<sup>2</sup>, Aditya Murthy<sup>1</sup>**

5                   <sup>1</sup>Centre for Neuroscience, Indian Institute of Science, Bengaluru, India

6                   <sup>2</sup>Department of Neuroscience, Columbia University, New York, NY, USA

7  
8  
9  
10           **Corresponding author:** Debaleena Basu

11  
12           **Email:** basu.debaleena@gmail.com

13  
14           **Key words:** Motor plans, saccade, FEF, EMG, neck muscles, leakage, periphery

15  
16           **Running title:** Peripheral signatures of sequential saccade planning

17           **Number of pages:** 30

18           **Figures:** 4

19           **Supplementary figures:** 4

20

21

## 22 **Summary**

23           Goal-directed behavior involves the transformation of neural movement plans into  
24 appropriate muscle activity patterns. Studies involving single saccades have shown that a rapid,  
25 direct pathway links saccade planning in frontal eye fields (FEF) to neck muscle activity. It is  
26 unknown if the rapid connection between FEF and neck muscle is maintained during sequential  
27 saccade planning. We show that sequence planning signals in the FEF are preserved in the  
28 neck EMG, although the activity is delayed specifically for the second saccade. Our results  
29 suggest that while the direct link between FEF and neck muscle facilitates downstream  
30 continuation of FEF response patterns, an indirect route exists through an inhibitory control  
31 center like the basal ganglia, limiting the information flow during processing of saccade  
32 sequences. Thus, the indirect and direct pathways from the FEF may function together to enable  
33 rapid synchronous, but controlled eye-head responses to sequential gaze shifts.

34

35

## 36 **Keywords**

37 Motor control, sequential saccades, neck muscles, primate electrophysiology, frontal eye field,  
38 neck electromyogram, gaze, eye-head coordination

39

40

41

## 42 **Introduction:**

43           When exploring the visual environment, we move our eyes and head to aim the line of  
44 sight (i.e., gaze) at a target of interest for it to be inspected by the eye's fovea (the area of  
45 maximum visual acuity). To achieve accurate gaze shifts, head movements must be precisely  
46 coordinated with saccadic eye movements. The frontal eye fields (FEF) have been shown to be  
47 a critical neural node for such eye-head coordination (Chen et al., 2006; Constantin et al., 2004;  
48 Elsley et al., 2007; Knight and Fuchs, 2007; Martinez-Trujillo et al., 2003; Monteon et al.,  
49 2010; Tu and Keating, 2000). However, the link between FEF and neck muscle has not been  
50 explored in the context of sequential eye movements - which comprise much of our daily  
51 behavior - and forms the basis for this study.

52           With the head unrestrained, microstimulation of the FEF evokes both eye-only and  
53 head-only movements, along with combined eye-head gaze movements, depending on the  
54 starting positions of the eyes and the head (Chen et al., 2006; Knight and Fuchs, 2007; Monteon  
55 et al., 2010; Tu and Keating, 2000). FEF stimulation results in rapid pre-saccadic recruitment  
56 of neck muscle activity, even when there is no overt head movement. Neck muscle recruitment  
57 has been shown for subthreshold saccadic stimulation and for small amplitude ( $\sim 13^\circ$ ) saccades  
58 typically not associated with head-motion (Corneil et al., 2010; Elsley et al., 2007). The activity  
59 of the neck muscles, which bring about head movement, is closely linked with saccade  
60 generation and the neural activity in FEF (Bizzi et al., 1972b, 1972a, 1971). Finally, the activity  
61 of the splenius capitis neck muscle has been shown to be predictive of saccadic RTs in both  
62 humans and monkeys (Goonetilleke et al., 2015; Rungta et al., 2021). Together, these studies  
63 indicate that FEF neural activity is tightly linked to neck muscle activity by a cascade of rapid  
64 downstream events.

65           Among the various control schemes hypothesized to explain the link between the eye  
66 and the head systems, the most parsimonious one suggests that a common gaze displacement  
67 signal is separated into eye and head displacement signals before reaching the brainstem  
68 movement generator circuitry (**Fig. 1A**). Results from various experimental studies on gaze  
69 shifts have converged towards this model (reviewed by Freedman, 2008). Interestingly,  
70 selective inhibitory gating of the saccadic burst neurons by the omnipause neurons ('Gate 2' in  
71 **Fig. 1A**) delays the activation of saccadic burst neurons, while allowing head movement signals  
72 to pass through, resulting in the observed presaccadic neck motor unit EMG activity. The early  
73 neck EMG signals allow for coordinated eye and head movements during gaze displacement  
74 despite the larger inertia of the head, when compared to the eyes. This link persists even during

75 tasks where eye movements were executed in head-restrained conditions, wherein neck EMG  
76 activation towards causing a head movement is not required (Lestienne et al., 1984; Rungta et  
77 al., 2021). Previous studies evidencing the tight association between neck muscle responses  
78 and the FEF have been performed from tasks involving isolated, single saccades. The question  
79 of how planning of sequential saccades affects neck muscle activity is yet unknown. Here, we  
80 investigated if the link between FEF and neck muscle permitted signatures of sequential  
81 saccade planning observed in the FEF, to pass down to the motor periphery.

82 Neck muscle activity during single saccade planning has been shown to follow FEF  
83 activity closely with a short latency (Elsley et al., 2007). We have previously shown that a  
84 sequence of two saccades may be programmed in parallel in the FEF, albeit with processing  
85 limitations (**Fig. 1B**; Basu et al., 2021; Basu and Murthy, 2020). The transfer of concurrent  
86 saccade programming signals from FEF to neck muscle may be inhibited to prevent premature  
87 head motion for second gaze shift while the first gaze plan is still underway. The node for such  
88 inhibitory control may be at the basal ganglia, which has been shown to bring about processing  
89 bottlenecks to prevent potential detrimental consequences of parallel programming of saccade  
90 plans (Bhutani et al., 2013). Basal ganglia also sends inhibitory projections to the superior  
91 colliculus (Hikosaka and Wurtz, 1985a, 1985b, 1983) directly through the substantia nigra pars  
92 reticulata (SNr) nuclei. Given its role in inhibitory control (Aron et al., 2007; Brittain et al.,  
93 2012; Frank et al., 2007), and sequential motor control (Aldridge and Berridge, 1998; Kermadi  
94 and Joseph, 1995; Mushiake and Strick, 1995), basal ganglia might act as a possible inhibitory  
95 control node for gaze shifts, delaying or inhibiting the downstream leakage of signals  
96 associated with the second saccade plan when programmed in parallel (*hypothesis 1* **Fig. 1C**).  
97 Alternatively, in a scenario mimicking the planning of single saccades, FEF signals encoding  
98 saccade sequences may pass down freely to the neck musculature with minimal conductive  
99 delay and bring about pre-saccadic recruitment of neck motor units (*hypothesis 2* **Fig. 1D**).

100 Our results show that aspects of both the direct and indirect connections between the  
101 FEF and neck muscle come into play during sequential saccade planning. Even when head  
102 movements were not required or executed, neck motor unit EMG showed remarkably preserved  
103 presaccadic activity profiles: signatures of parallel programming and its consequent processing  
104 bottlenecks in the FEF were observed in the peripheral neck EMG. The congruence between  
105 neural and peripheral activity profiles supports the hypothesis that a direct channel exists  
106 between FEF and neck muscle, even for planning of saccade sequences. However, the onsets  
107 of EMG activity were significantly delayed compared to neural activity onsets especially for

108 the second saccade plan, indicating that downstream flow of signals through the FEF-neck  
109 EMG circuit is not free from inhibitory control.

110

## 111 **Results:**

112 Two monkeys performed a sequential saccade task (FOLLOW task; see Methods)  
113 where in 70% of the trials (called ‘step trials’; **Fig. 2A**), they performed a rapid sequence of  
114 visually-guided saccades to two targets (T1 and T2) in the order of their appearance. In the step  
115 trials, the time between the T1 and T2 (called the target step delay or TSD) was randomly  
116 chosen among 17 ms, 83 ms, and 150 ms on each trial. In the remaining 30% of the trials (called  
117 ‘no-step’ trials; **Fig. 2B**), they made a single saccade to a single visual target that was presented.  
118 The two types of trials were randomly interleaved.

119 As the monkeys were performing the task, we recorded from FEF neurons and motor  
120 units from the dorsal neck muscle. We selected 76 motor units that were well isolated for  
121 further analyses. During a memory-guided saccade task (see Methods; **Fig. S1**), all the motor  
122 units showed a significant pre-saccadic rise of activity when the saccades were made into their  
123 response field (see Methods; **Fig. S1**) compared to when the saccades were made opposite to  
124 their response field. However, they had little or no activity in the visual epoch regardless of  
125 whether the target was present in the response field or not. Similar activity patterns were seen  
126 in no-step trials as well (**Fig. 2C**). To interpret the results in the context of FEF responses, we  
127 analyzed FEF neurons with a similar activity profile, i.e., FEF movement neurons (**Fig. 2C**).

128 Previous experiments have shown that microstimulation of the FEF elicits short latency  
129 (~20 ms) EMG responses from the dorsal neck muscles during a single saccade task (Elsley et  
130 al., 2007). To check the latency of neck muscle responses during sequential saccade planning,  
131 we compared the onsets of presaccadic activity for FEF and neck EMG for each of the two  
132 saccades in the FOLLOW task. In the trials where the first saccade went into the response field,  
133 the onsets for FEF and EMG activity were not significantly different at the population level for  
134 each of the three target step delays (*short*: Kruskal-Wallis,  $\chi^2(1, 101) = 2.58, p = 0.11$ ; *medium*:  
135 Kruskal-Wallis,  $\chi^2(1, 97) = 1.4, p = 0.24$ ; *long*: Kruskal-Wallis,  $\chi^2(1, 92) = 3.46, p = 0.06$ ).  
136 Activity for the second saccade plan on the other hand showed significantly different onsets  
137 between EMG and FEF (*short*: Kruskal-Wallis,  $\chi^2(1, 108) = 4.77, p < 0.05$ ; *medium*: Kruskal-

138 Wallis,  $\chi^2(1, 96) = 20.15, p < 0.001$ ; *long*: Kruskal-Wallis,  $\chi^2(1, 66) = 6.82, p < 0.01$ ). **Fig.**  
139 **2D-E** shows the cumulative distribution function of the activity onset times for neck EMG and  
140 FEF. While comparing onsets is an indirect measure of the delay between FEF and neck EMG,  
141 our results show that the differences in activity onsets is amplified specifically for the second  
142 saccade plan, indicating that inhibitory control comes into play in the FEF-neck EMG circuit  
143 for multiple saccades planned in a sequence.

144

#### 145 **Peripheral signatures of parallel programming during sequential saccades:**

146 Even though presaccadic neck EMG activity showed delayed onsets for the second  
147 saccade plan and implicates the indirect circuit (**Fig. 1C**), neural signatures of sequential  
148 saccade planning may still pass down from the FEF to the motor periphery, albeit with a delay.  
149 Our previous study has shown neural correlates of parallel programming of saccades in the  
150 FEF (Basu and Murthy, 2020). To assess whether neck motor activity carries signatures of  
151 parallel programming, we first analyzed saccadic behavior during the EMG sessions. The  
152 nature of sequential planning can be assessed by testing whether the interval between the  
153 saccades varies systematically with the duration available for parallel programming. This  
154 duration, called the parallel processing time (PPT; similar to delay D of Becker and Jürgens,  
155 1979), is the time when both saccade plans are underway, i.e., the time period from the  
156 appearance of the second target, to the end of the first saccade. If saccade programming were  
157 strictly serial, the inter-saccadic interval (ISI) would be fixed and independent of the time  
158 available for parallel programming (long or short PPT; **Fig. 3B**). In contrast, if the second  
159 saccade can be planned in parallel, shorter ISIs can be obtained for larger PPTs (**Fig. 3B**). Thus,  
160 the slope of the ISI-PPT plot is a behavioral metric for the concurrent programming of saccades  
161 (Becker and Jürgens, 1979; Bhutani et al., 2013, 2012; McPeck et al., 2003, 2000; Minken et  
162 al., 1993; Ray et al., 2004; Sharika et al., 2008; Wu et al., 2013). Consistent with this notion,  
163 the inter-saccadic interval (ISI) decreased significantly as the parallel processing time increased  
164 (**Fig. 3C**; one-way ANOVA,  $F(1, 148) = 189.82, p < 0.001$ ). Each session showed slopes that  
165 were significantly below zero (**Fig. 3C** inset; two-sided Wilcoxon signed rank test,  $Z = 5.21, p$   
166  $< 0.001$ ).

167 We then evaluated if the neck EMG activity showed correlates of parallel programming  
168 by analyzing the trials in which the second saccade went into the response field. Parallel  
169 programming at the level of the responses of FEF movement neurons was evinced by two main  
170 activity trends (Basu and Murthy, 2020): First, the neural selection time, demarcating the onset  
171 of neural activity specific to the second saccade, could start before the visual feedback of the

172 new eye position after the execution of the first saccade could reach FEF. Often the neural  
173 activity related to the second saccade started much before the onset of the first saccade, showing  
174 clear evidence that movement activity of a saccade plan can ramp-up while a previous plan is  
175 still ongoing. Second, as the parallel programming time (PPT) available decreased, the neural  
176 selection times progressively got delayed with respect to the first saccade onset, thus providing  
177 a direct correlation between neural activity and behavioral markers of parallel programming  
178 (Basu and Murthy, 2020).

179         If the basal ganglia circuitry restricts the signal flow between FEF and neck muscle for  
180 the second saccade, then it is plausible that activity at the level of neck muscle will be serialized  
181 (**Fig. 1C**). Neck muscle activity, however, showed remarkably preserved signatures of neural  
182 correlates of parallel programming, despite head-restraint and no requirement for overt head  
183 movements. The peripheral selection time (PST), calculated analogously to the neural selection  
184 time (NST; Basu and Murthy, 2020), was estimated by calculating the time when EMG activity  
185 for the second saccade plan crossed two standard deviations above the baseline activity (see  
186 Methods). The trials in each session were divided into short and long PPT trials based on  
187 whether the PPT value in a trial was below or above the mean PPT of the session. The  
188 peripheral selection times occurred before the visual feedback latency and sometimes even  
189 before the onset of the first saccade, especially for trials in the long PPT condition), indicating  
190 that motor unit activity associated with the second saccade plan could emerge before the end  
191 of the first saccade (**Fig. 3D**; median PST in long PPT group = -12 ms). Further, the peripheral  
192 selection times in the long PPT group were significantly lower than those of the short PPT  
193 group, i.e., when the time available for parallel programming is higher, the peripheral selection  
194 time shifts earlier in time with respect to the first saccade (**Fig. 3E**, Kruskal-Wallis,  $\chi^2(1, 127)$   
195 = 21.92,  $p < .001$ ) similar to the pattern seen in the concurrent FEF neural activity (Basu and  
196 Murthy, 2020). At the population level, the average peripheral selection time slope was  
197 significantly less than zero (two-sided Wilcoxon signed-rank test,  $Z = -5.66$ ,  $p < .001$ ), thus  
198 corroborating with the inverse NST-PPT relation shown in our previous study. Similar  
199 peripheral correlates of parallel processing were obtained for a restricted set of sessions with  
200 reaction time matched trials (**Fig. S2**), indicating that the inverse PST-PPT relationship we  
201 observed is not just a result of stochastic variability in the saccade planning processes. Thus,  
202 EMG activities elicited by multiple saccade plans can be active simultaneously, similar to the  
203 FEF activity patterns.

204         However, the peripheral selection time for motor units and neural selection time for  
205 FEF neurons differed significantly in the short (Wilcoxon signed-rank test,  $p < 0.001$ ) as well

206 as long (Wilcoxon signed-rank test,  $p < 0.001$ ) PPT conditions (**Fig. 3E**). The NST-PPT slopes  
207 were also more negative ( $-0.85 \pm 0.01$ ) than the PST-PPT slopes ( $-0.59 \pm 0.01$ ; Two-sample t-  
208 test  $p < 0.05$ ) suggesting that the EMG activity was less parallel than the FEF. The pattern of  
209 the cumulative distributions of the neural selection times of FEF movement neurons and  
210 peripheral selection times of neck muscle motor units shows that the peripheral selection times  
211 were delayed compared to the neural selection times (**Fig. 3F**). The median neural selection  
212 time in FEF for the long and short PPTs were 161 and 62 ms earlier compared to the peripheral  
213 selection times.

214 Thus, neck EMG activity can ramp up for a consecutive saccade whilst the previous  
215 one was still being programmed, fitting into hypothesis 2 (**Fig. 1D**), which is consistent with  
216 direct feedforward activation from FEF to the neck motor units. Paradoxically, EMG activity  
217 for the second saccade plan was delayed substantially with respect to the FEF activity onsets,  
218 providing evidence for hypothesis 1 (**Fig. 1C**). Our results indicate that while signals encoding  
219 saccade sequences pass down from oculomotor centers to the motor periphery and show similar  
220 patterns, the flow is not unchecked: the second saccade plan especially, appears to be gated by  
221 inhibitory control centers and thus has delayed activity onsets.

222

### 223 **Peripheral signatures of processing bottlenecks during sequential saccades:**

224 A complimentary aspect of parallel planning that enables rapid saccade sequencing, is  
225 the idea of processing bottlenecks that limit the extent of parallel planning so that saccades that  
226 are planned together are prevented from being executed together resulting in errors like  
227 averaged saccades, altered saccade metrics, or incorrect saccade order (Bhutani et al., 2017,  
228 2012). An increase in movement latencies provides behavioral evidence of processing  
229 bottlenecks (Pashler, 1994). Consistent with this notion, for both the first and second saccades,  
230 the reaction times across the population increased as the target step delay decreased from 150  
231 to 17 ms (RT2: one-way ANOVA,  $F(2, 160) = 112.09$ ,  $p < .001$ ; **Fig. S2**). In our previous  
232 study, we have shown that these longer response times reflect the activity of FEF responses  
233 which slows down when two closely-spaced saccade plans proceed simultaneously (Basu et  
234 al., 2021).

235 Before checking EMG responses for sequential saccades, we checked the EMG  
236 responses for single saccades in the no-step trials. Corroborating with the rise-to-threshold  
237 hypothesis of accumulator models (Hanes and Schall, 1996), FEF movement neuron activity



238 altered the rate of growth but not the threshold to account for reaction time variability in the  
239 single saccade no-step trials (Basu et al., 2021). The EMG activity showed similar profiles,  
240 ramping up activity in an accumulator framework, with the rate of growth on an average, being  
241 greater in trials with faster reaction times (one-way ANOVA,  $F(1, 123) = 12.89, p < .001$ ).  
242 The threshold activity did not change among the slow and fast reaction time groups (**Fig. S4**).

243 Having verified that the pattern of single-saccade related activity was preserved from  
244 FEF to the neck muscle, we next looked at the activity of motor units during step trials during  
245 sequential saccades. The accumulator framework for explaining reaction time variability  
246 observed in saccadic tasks have mostly been used for single saccade tasks. Our previous study  
247 showed that for sequential saccades, the accumulator parameters of rate and threshold varied  
248 with target step delay, but onset and baseline activity did not. We performed a similar analysis  
249 for neck EMG data to check if central planning signals reaching the motor periphery followed  
250 the pattern of accumulator activity observed in FEF.

251 EMG activity in trials in which the second saccade went into the RF distinguished  
252 between the target step delay conditions in a manner similar to FEF movement neurons: the  
253 rate of neck muscle activity decreased with decrease in target step delay, whereas threshold  
254 increased (**Fig.4A**). We performed a regression analysis for each motor unit wherein the slope  
255 of the best fit line was taken for each parameter (see Methods). Only the slopes for rate of  
256 activity growth and threshold for motor units were significantly different from zero (Wilcoxon  
257 signed-rank test for slopes of rates,  $Z = -2.71, p < .01$ , **Fig. 4B**; Wilcoxon signed-rank test for  
258 threshold of threshold,  $Z = -3.64, p < .01$ , **Fig. 4B**. Baseline and onset of activity did not  
259 distinguish between the target step delays across the population ( $p > .05$ ). The changes in these  
260 parameters reflected the population dynamics seen at the FEF level (Basu et al., 2021; **Fig.**  
261 **4C**). However, the slopes for rates were significantly higher for FEF neurons compared to  
262 motor units (Two-sample t-test  $p < .05$ ). The slopes for thresholds were not significantly  
263 different between FEF neurons and motor units (Wilcoxon signed-rank test  $p = 0.3368$ ).

264 Consistent with the results obtained from the FEF movement neuron activity (Basu et  
265 al., 2021), rate perturbation was present even when the first saccade went into the response  
266 field (**Fig. 4D-E**; Wilcoxon signed-rank test,  $Z = -3.54, p < .0001$ ). The slope of the threshold  
267 was not significantly different from zero (t-test  $p = 0.3090$ ; **Fig. 4E**) similar to FEF neural  
268 activity (t-test  $p = 0.2910$ ; **Fig. 4F**). However, the slopes for rates were slightly higher for FEF  
269 neurons compared to motor units (Two-sample t-test  $p = 0.0446$ ). The slopes for thresholds

270 were not significantly different between FEF neurons and motor units (Wilcoxon signed-rank  
271 test,  $p = 0.1777$ ). The fact that rate perturbation was present in both the saccade plans indicates  
272 that the signatures of processing bottlenecks that were observed in the responses of FEF  
273 neurons, were also seen in the motor periphery consistent with hypothesis 1 (**Fig. 1C**). Thus,  
274 neck muscle EMG patterns closely followed that of FEF, even though neck EMG activation  
275 for any oncoming head movement was unnecessary due to head-restraints.

276

## 277 **Discussion:**

278 In this study, we investigated the recruitment of the dorsal neck muscle in monkeys  
279 making sequential visually-guided saccades. The results indicate that putative motor units  
280 encoding the anticipated gaze movement for the second movement in a sequence are recruited  
281 in parallel with those encoding the first gaze shift vector, just as it is observed in FEF movement  
282 neurons. However, inhibitory control, specific for the second movement, was more prominent  
283 in the activity of motor units compared to the FEF. Taken together, these results suggest  
284 signatures of both the direct and indirect pathways between the FEF can be observed in the  
285 activity of neck muscles. The tight downstream linking of the FEF and the motor periphery is  
286 emphasized by the fact that neural patterns are preserved in the periphery even when no  
287 peripheral EMG activation is required by the task.

288

### 289 **Peripheral correlates of gaze planning signals**

290 The direct linking hypothesis between the FEF and neck musculature (Corneil et al.,  
291 2010, 2002a, 2002b) assumes that the FEF encodes a composite gaze command, which is then  
292 relayed to the superior colliculus, following which the eye and head commands are decomposed  
293 and relayed to separate brainstem premotor circuits. This scheme is supported by the fact that  
294 electrical stimulation of the FEF and caudal superior colliculus produces eye and head  
295 movements in cats and monkeys (Chen, 2006; Corneil et al., 2010, 2010; Cowie and Robinson,  
296 1994; Elsley et al., 2007; Freedman et al., 1996; Harris, 1980; Isa and Sasaki, 2002; Roucoux  
297 et al., 1980; Stryker and Schiller, 1975; Tu and Keating, 2000). Downstream to the superior  
298 colliculus, these gaze-related motor commands drive the extraocular and neck muscles,  
299 respectively, producing a coordinated gaze shift. Such coordination is thought to be facilitated  
300 by the absence of inhibitory gating by the omnipause neurons (Gate 2 in **Fig. 1A**) which may  
301 allow activity development in the inertia-laden neck muscle, leading to its rapid pre-saccadic  
302 recruitment, while preventing the signal from reaching the eye muscles prematurely. This

303 scheme forms the basis of our observation of a central correlate of movement planning reported  
304 in this study.

305 One prediction of such a direct pathway is that the latency of evoked neck muscle  
306 responses following FEF microstimulation can be as low as 20 ms (Elsley et al., 2007),  
307 probably indicating a ‘cephalomotor expression of a transient visual response that sweeps  
308 through extrastriate and oculomotor areas shortly after visual target onset’ (Goonetilleke et al.,  
309 2015). In this context, Corneil et al., (2004), found short latency stimulus-locked muscle  
310 responses, while the visuo-motor index of the motor units collected for this study (see Methods)  
311 was close to being pure movement -- in other words, the activity was saccade-related and did  
312 not show the visual burst. One explanation for the lack of visual activity is that it may be  
313 triggered in the context of a grasp reflex that demands rapid orienting of gaze (Corneil et al.,  
314 2008, 2004). As noted before, such leakage of signals into the periphery may also be sensitive  
315 to context (Pruszynski et al., 2010; Wood et al., 2015). Another and possibly more likely  
316 explanation could be that even in the original study done by Corneil et al. (2004), the stimulus-  
317 locked response of the splenius capitis muscle was much lower, while deeper muscles such as  
318 the rectus capitis posterior and the obliquus capitis inferior muscles showed robust stimulus-  
319 locked responses. Our recordings were done using external landmarks on the dorsal neck plane  
320 (see Methods) and we targeted the splenius capitis muscle, a large, superficial, ipsilateral head-  
321 turner, as it is easily accessible from the surface. When targeting the splenius capitis, the  
322 possibility of penetrating the rectus capitis posterior and obliquus capitis inferior is present but  
323 is highly unlikely as these smaller, deep-set muscles are difficult to reach. Nonetheless, despite  
324 the absence of a robust visual response, these results show that motor unit responses related to  
325 the second saccade can get initiated before the first saccade is completed.

326 An additional difference between current work and previous work is that the EMG  
327 signals were processed using a raster-based method, which is the standard approach used for  
328 neural data to answer how information is represented in different brain areas. We used the same  
329 approach to compare activity between the FEF and the neck motor unit activity in the periphery.  
330 In this context, it is interesting to note that a simple accumulator framework appeared to fulfil  
331 the requirements of a unifying framework that could link central processes like movement  
332 preparation to recruitment of motor units from periphery and behavioral reaction times (**Fig.**  
333 **S4**; Basu and Murthy, 2020; Carpenter and Williams, 1995; Hanes and Schall, 1996;  
334 Ramakrishnan et al., 2010). In such a framework, the rate of accumulation to a constant  
335 threshold determines the reaction time and forms the basis of studying their modulation in FEF  
336 and the peripheral musculature during sequential movements. Further, the congruence of

337 patterns in FEF and neck muscle activity in relation to reaction time reinforce the claim that  
338 such patterns of activity in the periphery reflect central processing as a consequence of the  
339 direct pathway between the FEF and the neck musculature.

340

### 341 **Peripheral correlates of inhibitory control of sequential movements through the indirect** 342 **pathway**

343 While the predictions of the direct circuit are well-tuned to the existing results from  
344 single gaze shifts, when extending this circuit from single to sequential movements, inhibitory  
345 control pathways specific to controlling sequences might come into play as a part of volitional  
346 gaze control. Bhutani et al. (2013) showed that the basal ganglia, a critical node of inhibitory  
347 control, is involved in the conversion of parallel movement plans into sequential behavior.  
348 Inactivation of the basal ganglia in monkeys or impairment of the basal ganglia in patients of  
349 Parkinson's disease resulted in a significantly greater extent of saccadic errors that develop due  
350 to unchecked parallel programming leading to a 'collision' of movement plans. It is well  
351 established that the connection between the FEF and the superior colliculus, a major sub-  
352 cortical node of oculomotor planning, share connections through the output nuclei of basal  
353 ganglia (substantia nigra pars reticulata; Hikosaka et al., 2000; Gate 1 in **Fig. 1A**), and possibly,  
354 it is this loss of inhibition (transiently by muscimol inactivation or chronically in Parkinson's  
355 disease patients) that led to an increase in saccadic errors. Given the importance of the role of  
356 the basal ganglia in the correct execution of saccade sequences, it stands to reason that such  
357 inhibitory control specific to sequences of gaze to prevent concurrent activations of the sluggish  
358 neck muscles (agonist and antagonist), and any detrimental synergies that might develop from  
359 multiple co-activations.

360 Since the FEF-neck muscle 'neural highway' involves the FEF-superior colliculus  
361 circuit, which is known to be gated by the basal ganglia (Gate 1 in **Fig. 1A**), the downstream  
362 leakage of gaze planning signals from FEF to the motor periphery might be limited by the basal  
363 ganglia inhibitory node for more than one gaze shift. Consistent with this hypothesis, our results  
364 show neck muscle activity for the second saccade was delayed relative to the neural selection  
365 time in FEF for all target step delays but was not significantly different for the first saccade  
366 (compare **Figs. 2D** and **2E**).

367 The selective delaying of the peripheral selection time (PST) for the second saccade  
368 results in the shortening of the intervals between PST1 and PST2, relative to NST1 and NST2  
369 (compare **Fig. 4E** and **Fig. 4F**). In other words, the effective processing rate is smaller in the  
370 periphery compared to the FEF. Thus, it appears that the descending input from FEF to superior

371 colliculus, the putative pathway through which the gaze command leaks down to the motor  
372 periphery, is routed through the basal ganglia gate specifically to delay and serialize neck  
373 muscle responses. However, the inhibition is not complete or strong enough to act as a ‘global  
374 stop’ preventing all passive leakage from the FEF or inhibit concurrent flow of gaze planning  
375 signals to the periphery, as seen in the results of our study.

376

377

### 378 **Peripheral signatures of parallel processing and processing bottlenecks for sequential** 379 **gaze shifts**

380 Although neck muscles responses did show the presence of additional inhibitory  
381 control, presumably mediated by the intervening basal ganglia, a rather surprising result was  
382 the close correspondence between signatures of planning in the FEF and the motor unit activity.  
383 Like in FEF, we found evidence of parallel processing such that motor unit responses related  
384 to the second saccade can get initiated before the first saccade is completed (**Fig. 3**). The onsets  
385 of the EMG activity, or the peripheral selection times occurred earlier as PPT was increased,  
386 similar to the results obtained with neural selection times (Basu and Murthy, 2020; **Fig. 3**).  
387 Further when two saccade plans overlap too closely (target step delay = 17 ms), the extent of  
388 parallel programming is controlled by adjustments in the rate and threshold of EMG activity in  
389 a manner similar to what is seen in FEF movement neurons (**Fig. 4**). These adjustments closely  
390 match those of FEF movement neurons: while changes in both slope and rate in FEF and motor  
391 unit activity were associated with the second saccade, only changes in slope but not threshold  
392 were observed in FEF and motor unit activity were associated with the first saccade response.  
393 These results extend the link between the FEF and neck muscle seen in single saccade tasks to  
394 sequential saccade planning. The fact that such central planning patterns for sequential  
395 saccades are maintained at the periphery suggests that the leakage down of signals at the  
396 periphery is almost like a passive down-flow of central planning signals involving the direct  
397 pathway. Therefore, taken together, our results suggest that motor unit activity reflects input  
398 from both the direct and indirect pathways: while the direct pathway mirrors the activity of the  
399 FEF onto the motor units; inhibitory control by the basal ganglia, through the basal ganglia-  
400 thalamo-cortical loop, may be another pathway through which the basal ganglia can modulate  
401 the activity of FEF neurons and bring about the observed processing bottlenecks in both the  
402 FEF and the motor unit activity.

403

404

405

## 406 **Acknowledgements**

407 We thank S. Sengupta for helping with behavioral training and Dr. A. Gopal P.A. and Dr. S.  
408 Rungta for helping with the data collection.

409

### 410 **Funding:**

411 This work was supported by a D.B.T.-I.I.Sc (Department of Biotechnology, Government of  
412 India – Indian Institute of Science) partnership grant given to A.M. D.B was supported by a  
413 graduate fellowship from the Ministry of Human Resource Development (MHRD),  
414 Government of India, through the Indian Institute of Science.

415

416

## 417 **Author contributions**

418 Conceptualization, A.M.; Methodology, D.B.; Formal analysis, D.B.; Investigation, D.B.;  
419 Writing – Original Draft, D.B., N.S., & A.M.; Writing – Review & Editing, D.B., N.S., &  
420 A.M.; Visualization, D.B. & N.S.; Supervision, A.M.; Project administration, A.M.; Funding  
421 Acquisition, A.M.

422

423

424

## 425 **Declaration of interests**

426 The authors declare no competing interests.

427

428

429

430

431

432

433

434

435

436

437

438

439

440

441

442 **Figures**

443

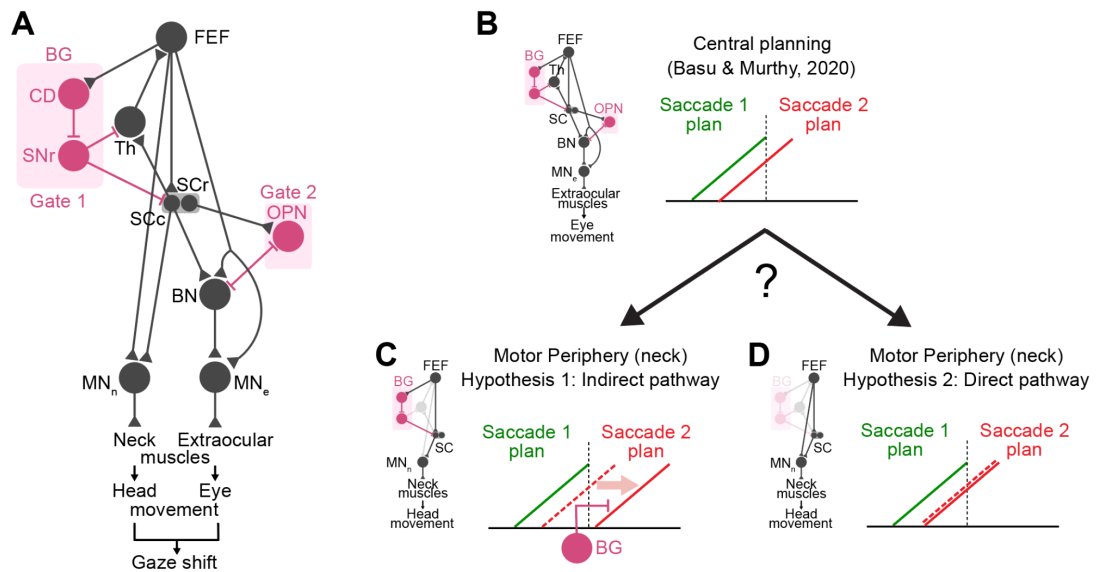

444

445

**Figure 1. Connections linking FEF to neck muscles**

446

447 **A.** A basic schematic showing the putative connection between FEF and neck muscle. A common gaze command is relayed from the FEF to the superior colliculus (SC), which is then decomposed into head and eye commands by distinct brain stem premotor circuits. Head premotor cells innervating neck muscles (MN<sub>n</sub>) are not subjected to the inhibition of omnipause neurons (OPN), allowing the rapid pre-saccadic recruitment of neck muscles. BN and MN refer to burst neurons and motoneurons, respectively. The pathway from FEF to superior colliculus is gated by basal ganglia (BG), a major node of inhibitory control. CD and SNr refer to the caudate nucleus and substantia nigra. Connections with triangular endings represent excitatory connections and connections with line endings represent inhibitory connections.

456

457 **B.** FEF movement activity for the second saccade plan could rise before the onset of the first saccade (as shown in Basu and Murthy, 2020).

459

460 **C.** Hypothesis 1 - Indirect pathway: If basal ganglia is gating the transmission of motor signals from FEF to neck muscle for sequential saccades, then presaccadic EMG activity related to the second saccade will be delayed or inhibited compared to the FEF signal. A possible anatomical framework explaining this is shown to the left.

464

465 **D.** Hypothesis 2 - Direct pathway: If the basal ganglia gate does not play a major role, then a direct connection between FEF and motor neck muscles (as shown in the left) could allow for EMG activity to be initiated with minimal delay after the onset of presaccadic FEF activity. The EMG activity would be expected to mirror the FEF activity patterns.

469

470

471

472

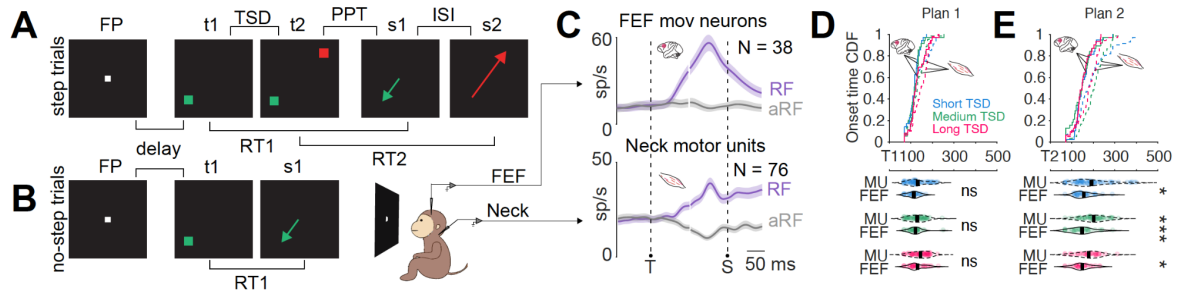

**Figure 2. FEF and EMG Activity in the FOLLOW task**

- 473  
474  
475  
476  
477  
478 **A.** Schematic of a step trial in the FOLLOW task.  
479  
480 **B.** Schematic of a no-step trial in the FOLLOW task.  
481  
482 **C.** Population activity for saccades into the response field (RF; *purple*) and saccades out of the  
483 response field (aRF; *gray*) for FEF movement neurons (top) and neck motor units (bottom) aligned  
484 to target onset (T) and saccade onset (S) during the no-step trials. The solid line indicates the mean  
485 activity, and the shaded region indicates the mean  $\pm$  SEM.  
486  
487 **D.** *Top*: CDF of onset times for three target step delays (TSD) for FEF and motor units for saccade  
488 plan 1. *Bottom*: Same data as top panel visualized in bee-swarm plots. The vertical black line within  
489 each plot indicates the average value.  
490  
491 **E.** Same as **D** but for saccade plan 2.  
492  
493  
494  
495  
496  
497  
498  
499  
500  
501  
502  
503  
504  
505  
506  
507  
508  
509  
510  
511



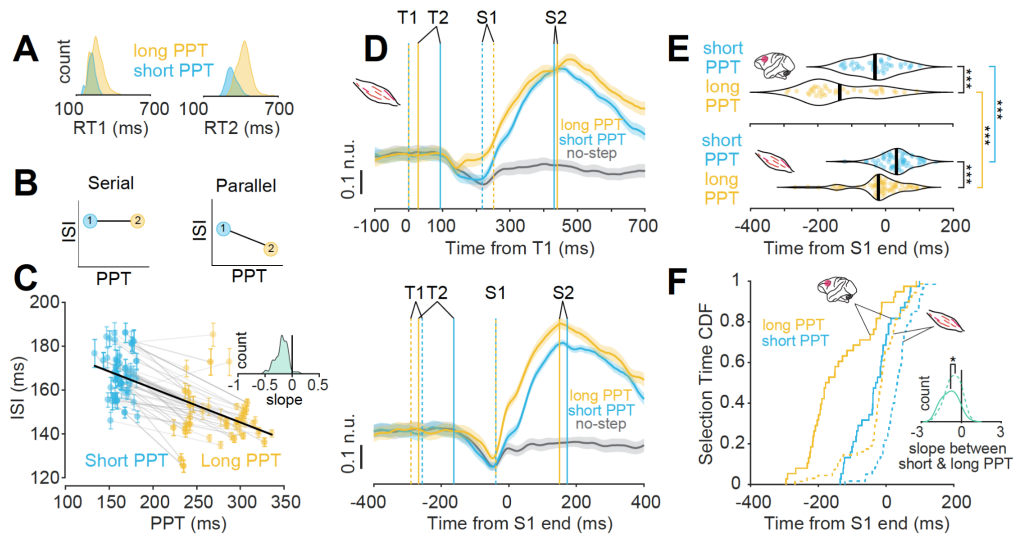

512

513

514

**Figure 3. Activity of neck muscle motor units show correlates of parallel programming**

515

516 **A.** RT1 distribution (top) and RT2 distribution (bottom) for short (blue) and long (yellow) PPT  
517 conditions.

518

519 **B.** Illustration of the relationship between ISI and PPT for serial (top) and parallel (bottom) processing.  
520

521

522 **C.** ISI vs PPT plot for each session. Inset shows the distribution of slopes between ISI and PPT.

523

524 **D.** Top: Motor unit population activity (mean  $\pm$  SEM) when the second saccade was made into the  
525 movement field for short and long PPT conditions (*blue* and *yellow* respectively). The activity is  
526 aligned to the first target onset and contrasted with the no-step activity of saccades made outside of  
527 the movement field (*black line*). T1 and T2 represent target 1 and target 2 onsets and S1 and S2  
528 represent saccade 1 and saccade 2 onsets. Bottom: same as top panel but aligned to the end of the  
529 first saccade. The solid line indicates the mean activity, and the shading indicates mean  $\pm$  SEM.

530

531 **E.** Top: Neural selection times for all the FEF neurons for short and long PPT (as already shown in  
532 Basu and Murthy, 2020). Bottom: Peripheral selection times for all the motor units for short and  
533 long PPT. \*\*\* means  $p < .001$

534

535 **F.** Same data from **E**, represented as cumulative selection times for short (*blue*) and long (*yellow*)  
536 PPTs for motor units (*broken lines*) and FEF neurons (*solid lines*). Inset: The distribution of slopes  
537 between short and long PPT for FEF neurons (*solid line*) and motor units (*broken line*). \* means  
538  $p < 0.05$

539

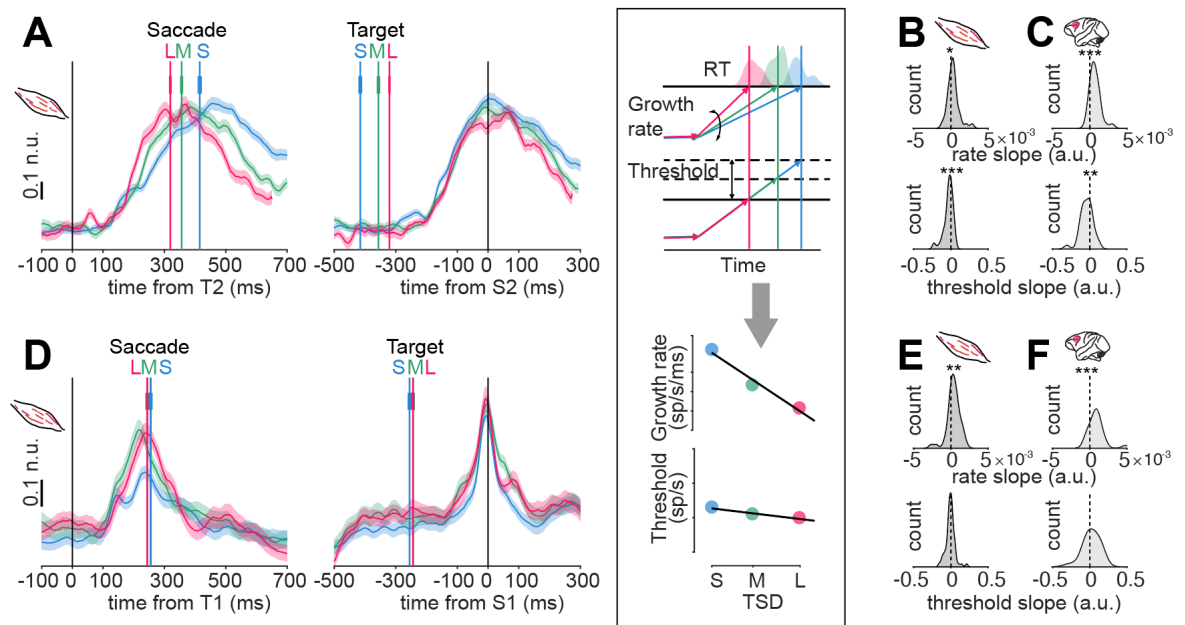

540  
541  
542  
543  
544

**Figure 4. Activity of motor units during the second saccade plan show signatures of processing bottlenecks**

- 545 A. Population activity of the motor units when the second saccade went into the response field,  
546 aligned on the second target onset (*left*) and the start of the second saccade (*right*). The solid line  
547 indicates the mean activity, and the shaded area indicates mean  $\pm$  SEM. S, M, L indicate short,  
548 medium, and long TSD respectively.  
549 *Boxed inset*: The top panel shows the modulations expected for growth rate and threshold activity,  
550 along with the RT histograms. The bottom panel shows a schematic of the variation in growth rate  
551 and threshold across TSD for an example motor unit. For each motor unit, the slope derived for  
552 each parameter from the best fitting line is used in Figures B & E.  
553
- 554 B. Histograms of slopes of the change of muscle activity parameters (*top*: rate, *bottom*: threshold)  
555 with target step delay in individual motor units.  
556
- 557 C. Same as C but for FEF neurons as already shown in Basu et al., 2021.  
558
- 559 D. Population activity of the motor units when the first saccade went into the response field,  
560 aligned on the first target onset (*left*) and the start of the first saccade (*right*). The solid line indicates the  
561 mean activity, and the shaded area indicates mean  $\pm$  SEM.  
562
- 563 E. Histograms of slopes of the change of muscle activity parameters (*top*: rate, *bottom*: threshold)  
564 with target step delay in individual motor units.  
565
- 566 F. Same as F but for FEF neurons as already shown in Basu et al., 2021.  
567  
568

## 569 **Methods**

570           The methods that were used in this study have been described in detail elsewhere (Basu  
571 et al., 2021; Basu and Murthy, 2020; Rungta et al., 2021; Sendhilnathan et al., 2021). Here, we  
572 describe them briefly.

573 **Subjects:** We used two adult monkeys, J (*Macaca Mulata*, male, age = 9 yrs; weight = 5.5 kgs)  
574 and G (*Macaca radiata*, female, age = 11 yrs; weight = 3.8 kgs) for the experiments. All  
575 surgical procedures and monkey care were in compliance with the animal ethics guidelines of  
576 the Committee for the Purpose of Control and Supervision of Experiments on Animals  
577 (CPCSEA), Government of India, and the Institutional Animal Ethics Committee (IAEC) of  
578 the Indian Institute of Science that approved the protocols.

579 **Behavioral tasks:** The monkeys were trained on two oculomotor tasks: the memory-guided  
580 saccade task and the FOLLOW task. In the memory-guided saccade task, each trial started with  
581 a red fixation point ( $0.6^\circ \times 0.6^\circ$ ) appearing at the center of a screen. After a variable fixation  
582 period, a gray target stimulus ( $1^\circ \times 1^\circ$ ) was flashed briefly (100 ms) at a peripheral location.  
583 The monkeys continued fixating for about 1000 ms (delay period), following which the central  
584 fixation spot disappeared. A single saccade had to be made to the remembered location of the  
585 target, after which juice rewards were given. The MG task was used to identify the response  
586 field of neurons (**Fig. S1**; see next section below) and to classify the neurons. In the FOLLOW  
587 task (**Fig. 2A, B**) monkeys made a sequence of two visually-guided saccades. After central  
588 fixation, a green target appeared at any one of the six possible peripheral locations. In 70% of  
589 the trials (*step trials*) the first green target was followed by a second red target and the monkey  
590 had to execute a sequence of two saccades in order of target appearance. The remaining *no-*  
591 *step* trials had only one target and the monkey had to make one saccade to the target. The  
592 temporal gap between the first and second targets in step trials is referred to as the target step  
593 delay and was picked randomly from 17 ms, 83 ms, and 150 ms.

594 **Data acquisition:** The tasks were controlled and displayed using a TEMPO/VIDEOSYNC  
595 system (Reflecting Computing, St. Louis, MO, USA). Electrophysiological data was acquired  
596 using the Cerebus data acquisition system (Blackrock Microsystems, Salt Lake City, UT,  
597 USA). A monocular infrared pupil tracker (ISCAN, Woburn, MA USA) was used to collect  
598 eye position data. All stimuli were presented on a Sony Bravia LCD monitor (42 inches, 60 Hz

599 refresh rate;  $640 \times 480$  resolution) placed 57 cm from the monkeys. The monkeys were head-  
600 restrained during the tasks.

601 The electrophysiological data consisted of neural data from the FEF and  
602 Electromyographic (EMG) data from the dorsal neck muscles. Neural data was recorded using  
603 tungsten microelectrodes (FHC, Bowdoin, ME, USA; impedance: 2 to 4 M $\Omega$ ). EMG activity  
604 from the dorsal neck muscle was recorded bilaterally using intramuscular,  
605 Polytetrafluoroethylene-coated stainless steel needle electrodes (diameter 0.36 mm; TECA  
606 Elite series, Natus Neurology, Middleton, WI, USA). EMG needle electrodes were inserted  
607 using externally available landmarks on the dorsal neck. The dorsal neck plane was framed into  
608 a two-dimensional Cartesian coordinate system using the external occipital protuberance and  
609 the dorsal midline as the horizontal and vertical axes respectively. All the insertions for the two  
610 monkeys were within 2-4 cm of the horizontal and vertical axes.

611 Electrophysiological data was sampled and stored at 30,000 Hz by the Cerebus data  
612 acquisition system (Blackrock Microsystems, Salt Lake City, UT, USA). Cerebus Central Suite  
613 software (Blackrock Microsystems) was used to visualize both neuronal and motor unit data,  
614 classify units online, and mark the time of action potentials.

615 **Data Analyses:** Neural and EMG data was band-pass filtered (250Hz-5kHz) and sorted into  
616 individual units offline using the offline sorter provided with the Cerebus Central Suite  
617 (Blackrock Microsystems). Spike-timings obtained after offline sorting were down-sampled to  
618 1 KHz to match the sampling rate of task parameters. Saccade onset and offset times were  
619 detected from the eye position data using a velocity threshold. All analyses, post spike sorting,  
620 were done using custom-made scripts written in MATLAB (MathWorks, Natick, MA, USA).  
621 The final dataset used in this study comprises units primarily showing presaccadic activity: 38  
622 FEF movement neurons and 76 motor-units. To compare across the neuronal and EMG data,  
623 both types of data were displayed as continuous spike density functions (SDF) and were  
624 analyzed similarly. The spike density functions were calculated by convolving the averaged  
625 spike train with a filter that resembled an excitatory post-synaptic potential, having a  
626 combination of growth and decay exponential functions. The time constants of the rapid growth  
627 phase ( $\tau_g = 1$  ms) and the slower decay phase ( $\tau_d = 20$  ms) were matched to values obtained  
628 from excitatory synapses (Kim and Connors, 1993; Sayer et al., 1990).

629

630 **Response field:** Response field (RF) identification was done using the memory-guided saccade  
631 task. Three target locations with the highest activity were named as locations inside the  
632 response field and the three diametrically opposite locations were considered to be outside-RF  
633 locations. The first target in the FOLLOW task could appear at any of six inside response field  
634 and outside response field locations. The second target in step trials, however, could only  
635 appear at any of the three positions diametrically opposite to the location of the first target.  
636 This was done to maintain a wide separation between the two saccade targets and prevent  
637 averaging of the first and second saccades.

638  
639 **Visuo-motor index:** We classified the neurons and motor units by identifying their discharge  
640 patterns in the memory-guided saccade task. We also computed a visuo-motor index (VMI) to  
641 quantify the ratio of target-related and saccade-related activities among the classified neuron  
642 (Murthy et al., 2007).

$$643 \quad VMI = \frac{VA - MA}{VA + MA}$$

644 where  $VA = \text{mean firing rate in the visual epoch}$

645  $MA = \text{mean firing rate in the movement epoch}$

646  
647 VMIs ranged from +1 to -1. Movement neurons had highly negative VMIs ( $<-0.33$ ).

648  
649 **Measures of EMG activity dynamics:**

650 We analyzed the EMG data using an accumulator framework, looking at four main  
651 features: baseline, onset, rate of activity growth, threshold. The results were compared with  
652 similar parameters calculated in a prior study on FEF neurons (Basu et al., 2021). Each  
653 accumulator parameter was calculated separately for the first saccade plan (first saccade was  
654 made to the RF) and the second saccade plan (second saccade was made to the RF).

655  
656 Differential activity (activity in step trials – activity in outside-RF no-step trials) was  
657 used to calculate accumulator parameters for both motor units and neurons.

658  
659 • Baseline activity = Mean differential activity in the 100 ms period before onset  
660 of first target.

- 661
- Onset of saccade-related activity = First time-point at which differential activity  
662 exceeded two standard deviations (SD) of baseline activity, ultimately crossing  
663 4SDs, and staying above 2SDs for 50 ms (second plan) and 30 ms (first plan).
    - The onset of second saccade-related activity or the peripheral selection  
664 time (PST; shown in **Fig. 3**) was calculated similarly (Basu and Murthy,  
665 2020). PST was defined as the time point when differential activity in  
666 trials where the second saccade went into RF exceeded 2 SDs above  
667 baseline activity and stayed above 2SDs for 45 ms and reached 4SDs  
668 within this time window.
  - Threshold activation: Mean activity in the 10 to 20 ms period preceding saccade  
670 onset.  
671
  - Growth rate: Difference between threshold activation and activity at onset,  
672 divided by the time period from onset to threshold.  
673
- 674

675 For visualizing population activity profiles, SDFs were normalized to the peak activity  
676 in the TSD 17 ms condition for each motor unit.

677

678 **Statistical tests:** For a single group of data, a two-sided Wilcoxon signed-rank test was used.  
679 For comparison across multiple groups, the Kruskal-Wallis test was primarily used. All the  
680 results are presented as mean ( $\pm$  standard error of mean, SEM) and all tests are performed at a  
681 significance level of  $\alpha = 0.05$  unless otherwise mentioned.

682

## 683 Supplementary Figures

684  
685  
686

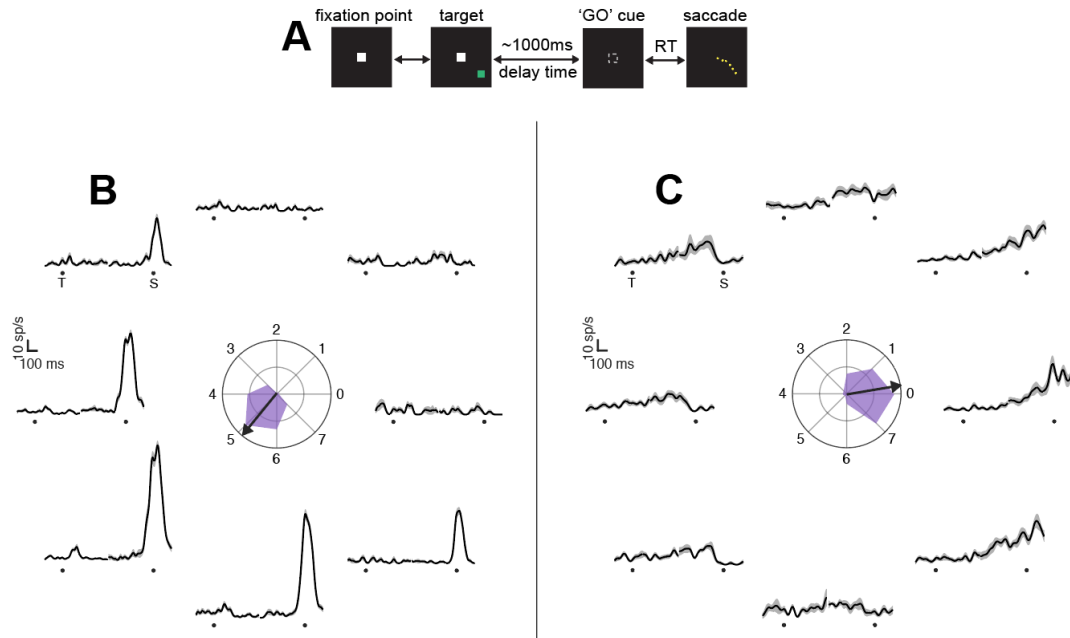

687  
688  
689

**Figure S1. Memory guided saccade task and electrophysiology**

690

A. Schematic of the memory-guided (MG) saccade task.

692

B. Activity of a representative FEF movement neuron in the MG task for all eight target positions.

694

C. Same as B but for a representative motor unit.

696

697

698

699

700

701

702

703

704

705

706

707

708

709

710

711

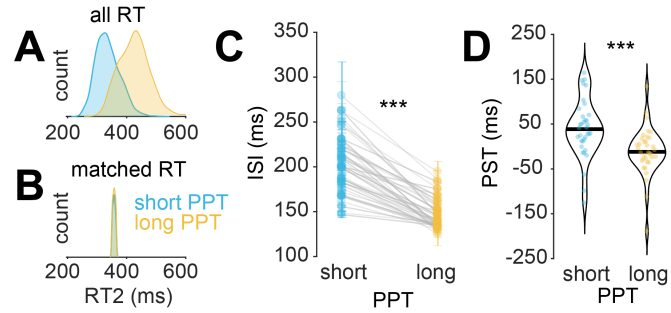

**Figure S2. Activity of motor units show signatures of parallel programming in latency-matched trials.**

- 712  
713  
714  
715  
716  
717  
718  
719  
720  
721  
722  
723  
724  
725  
726  
727  
728  
729  
730  
731  
732  
733  
734  
735  
736  
737  
738  
739  
740  
741  
742  
743  
744  
745  
746  
747
- A. Distribution of second saccade reaction times for the short (*blue*) and long (*yellow*) PPT conditions.
  - B. Reaction times that were matched between the short and long PPT conditions.
  - C. ISIs vs PPT plot for reaction time matched trials. \*\*\* means  $p < 0.001$
  - D. Peripheral selection times for short and long PPT conditions for latency-matched trials. \*\*\* means  $p < 0.001$



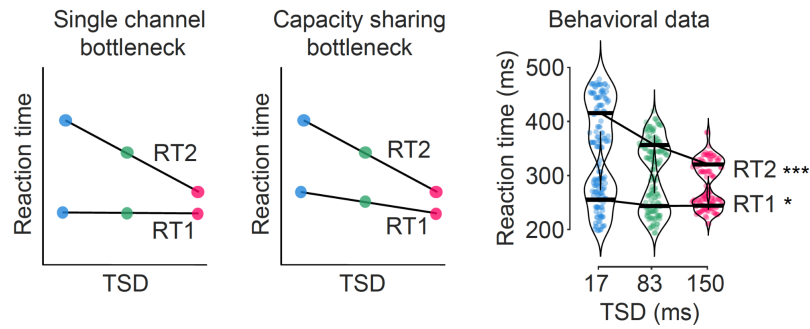

748  
749  
750  
751

### Figure S3. Reaction time vs target step delay

752 *Left panel:* Reaction time vs target step delay (TSD) predictions based on single-channel  
753 bottleneck model.

754 *Middle panel:* Reaction time vs target step delay (TSD) predictions based on capacity-  
755 sharing bottleneck model.

756 *Right panel:* Behavioral data for reaction time vs target step delay (TSD). Data shows trials  
757 in which the first (for RT1) or second (for RT2) saccade was into the response field. Both reaction  
758 times increased significantly with decrease in target step delay. \*\*\* means  $p < 0.001$  and \* means  $p$   
759  $< 0.05$

760  
761  
762  
763  
764  
765  
766  
767  
768  
769  
770  
771  
772  
773  
774  
775  
776  
777  
778  
779  
780

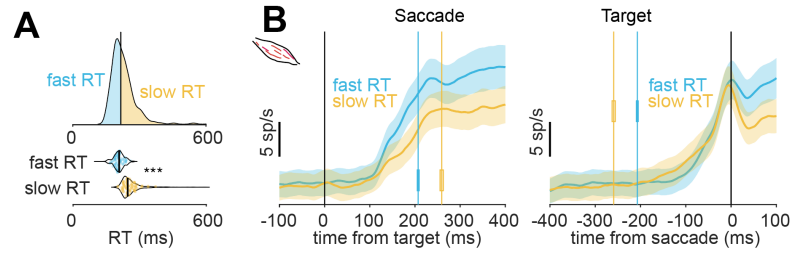

781  
782  
783  
784  
785  
786  
787  
788  
789  
790  
791  
792  
793  
794  
795  
796  
797  
798  
799  
800  
801  
802  
803  
804  
805  
806  
807  
808  
809  
810  
811  
812  
813  
814  
815  
816  
817  
818  
819  
820  
821

**Figure S4. Activity of motor units correlated with reaction time in no-step trials.**

- A.** *Top:* Reaction time (RT) distribution for a representative session showing the fast and slow reaction times. *Bottom:* Fast and slow reaction time values for all recorded sessions. \*\*\* means  $p < 0.001$
- B.** EMG activity in single saccade no-step trials ramped up faster for saccades with faster reaction time (*left*). The threshold activity did not change across the two conditions in the population (*right*). The solid line indicates the mean activity and the shaded area indicates mean  $\pm$  SEM.

## 822 **References**

- 823 Aldridge, J.W., Berridge, K.C., 1998. Coding of serial order by neostriatal neurons: a “natural action”  
824 approach to movement sequence. *J Neurosci* 18, 2777–2787.
- 825 Aron, A.R., Durston, S., Eagle, D.M., Logan, G.D., Stinear, C.M., Stuphorn, V., 2007. Converging  
826 evidence for a fronto-basal-ganglia network for inhibitory control of action and cognition. *J*  
827 *Neurosci* 27, 11860–11864. <https://doi.org/10.1523/JNEUROSCI.3644-07.2007>
- 828 Basu, D., Murthy, A., 2020. Parallel programming of saccades in the macaque frontal eye field: are  
829 sequential motor plans coactivated? *J Neurophysiol* 123, 107–119.  
830 <https://doi.org/10.1152/jn.00545.2018>
- 831 Basu, D., Sendhilnathan, N., Murthy, A., 2021. Neural mechanisms underlying the temporal control  
832 of sequential saccade planning in the frontal eye field. *Proceedings of the National Academy*  
833 *of Sciences*.
- 834 Becker, W., Jürgens, R., 1979. An analysis of the saccadic system by means of double step stimuli.  
835 *Vision Res* 19, 967–983. [https://doi.org/10.1016/0042-6989\(79\)90222-0](https://doi.org/10.1016/0042-6989(79)90222-0)
- 836 Bhutani, N., Ray, S., Murthy, A., 2012. Is saccade averaging determined by visual processing or  
837 movement planning? *J Neurophysiol* 108, 3161–3171. <https://doi.org/10.1152/jn.00344.2012>
- 838 Bhutani, N., Sureshababu, R., Farooqui, A.A., Behari, M., Goyal, V., Murthy, A., 2013. Queuing of  
839 concurrent movement plans by basal ganglia. *J Neurosci* 33, 9985–9997.  
840 <https://doi.org/10.1523/JNEUROSCI.4934-12.2013>
- 841 Bizzi, E., Kalil, R.E., Morasso, P., 1972a. Two modes of active eye-head coordination in monkeys.  
842 *Brain Res* 40, 45–48. [https://doi.org/10.1016/0006-8993\(72\)90104-7](https://doi.org/10.1016/0006-8993(72)90104-7)
- 843 Bizzi, E., Kalil, R.E., Morasso, P., Tagliasco, V., 1972b. Central programming and peripheral  
844 feedback during eye-head coordination in monkeys. *Bibl Ophthalmol* 82, 220–232.
- 845 Bizzi, E., Kalil, R.E., Tagliasco, V., 1971. Eye-head coordination in monkeys: evidence for centrally  
846 patterned organization. *Science* 173, 452–454. <https://doi.org/10.1126/science.173.3995.452>
- 847 Brittain, J.-S., Watkins, K.E., Joundi, R.A., Ray, N.J., Holland, P., Green, A.L., Aziz, T.Z., Jenkinson,  
848 N., 2012. A role for the subthalamic nucleus in response inhibition during conflict. *J Neurosci*  
849 32, 13396–13401. <https://doi.org/10.1523/JNEUROSCI.2259-12.2012>
- 850 Carpenter, R.H., Williams, M.L., 1995. Neural computation of log likelihood in control of saccadic  
851 eye movements. *Nature* 377, 59–62. <https://doi.org/10.1038/377059a0>
- 852 Chen, L.L., 2006. Head movements evoked by electrical stimulation in the frontal eye field of the  
853 monkey: evidence for independent eye and head control. *J Neurophysiol* 95, 3528–3542.  
854 <https://doi.org/10.1152/jn.01320.2005>
- 855 Chen, Q., Wei, P., Zhou, X., 2006. Distinct neural correlates for resolving stroop conflict at inhibited  
856 and noninhibited locations in inhibition of return. *J Cogn Neurosci* 18, 1937–1946.  
857 <https://doi.org/10.1162/jocn.2006.18.11.1937>
- 858 Constantin, A.G., Wang, H., Crawford, J.D., 2004. Role of superior colliculus in adaptive eye-head  
859 coordination during gaze shifts. *J Neurophysiol* 92, 2168–2184.  
860 <https://doi.org/10.1152/jn.00103.2004>
- 861 Corneil, B.D., Elsley, J.K., Nagy, B., Cushing, S.L., 2010. Motor output evoked by subsaccadic  
862 stimulation of primate frontal eye fields. *Proc Natl Acad Sci U S A* 107, 6070–6075.  
863 <https://doi.org/10.1073/pnas.0911902107>
- 864 Corneil, B.D., Munoz, D.P., Chapman, B.B., Admans, T., Cushing, S.L., 2008. Neuromuscular  
865 consequences of reflexive covert orienting. *Nat Neurosci* 11, 13–15.  
866 <https://doi.org/10.1038/nn2023>
- 867 Corneil, B.D., Olivier, E., Munoz, D.P., 2004. Visual responses on neck muscles reveal selective  
868 gating that prevents express saccades. *Neuron* 42, 831–841. [https://doi.org/10.1016/s0896-6273\(04\)00267-3](https://doi.org/10.1016/s0896-6273(04)00267-3)
- 869
- 870 Corneil, B.D., Olivier, E., Munoz, D.P., 2002a. Neck muscle responses to stimulation of monkey  
871 superior colliculus. I. Topography and manipulation of stimulation parameters. *J*  
872 *Neurophysiol* 88, 1980–1999. <https://doi.org/10.1152/jn.2002.88.4.1980>

- 873 Corneil, B.D., Olivier, E., Munoz, D.P., 2002b. Neck muscle responses to stimulation of monkey  
874 superior colliculus. II. Gaze shift initiation and volitional head movements. *J Neurophysiol*  
875 88, 2000–2018. <https://doi.org/10.1152/jn.2002.88.4.2000>
- 876 Cowie, R.J., Robinson, D.L., 1994. Subcortical contributions to head movements in macaques. I.  
877 Contrasting effects of electrical stimulation of a medial pontomedullary region and the  
878 superior colliculus. *J Neurophysiol* 72, 2648–2664. <https://doi.org/10.1152/jn.1994.72.6.2648>
- 879 Elsley, J.K., Nagy, B., Cushing, S.L., Corneil, B.D., 2007. Widespread presaccadic recruitment of  
880 neck muscles by stimulation of the primate frontal eye fields. *J Neurophysiol* 98, 1333–1354.  
881 <https://doi.org/10.1152/jn.00386.2007>
- 882 Frank, M.J., Samanta, J., Moustafa, A.A., Sherman, S.J., 2007. Hold your horses: impulsivity, deep  
883 brain stimulation, and medication in parkinsonism. *Science* 318, 1309–1312.  
884 <https://doi.org/10.1126/science.1146157>
- 885 Freedman, E.G., 2008. Coordination of the eyes and head during visual orienting. *Exp Brain Res* 190,  
886 369–387. <https://doi.org/10.1007/s00221-008-1504-8>
- 887 Freedman, E.G., Stanford, T.R., Sparks, D.L., 1996. Combined eye-head gaze shifts produced by  
888 electrical stimulation of the superior colliculus in rhesus monkeys. *J Neurophysiol* 76, 927–  
889 952. <https://doi.org/10.1152/jn.1996.76.2.927>
- 890 Goonetilleke, S.C., Katz, L., Wood, D.K., Gu, C., Huk, A.C., Corneil, B.D., 2015. Cross-species  
891 comparison of anticipatory and stimulus-driven neck muscle activity well before saccadic  
892 gaze shifts in humans and nonhuman primates. *J Neurophysiol* 114, 902–913.  
893 <https://doi.org/10.1152/jn.00230.2015>
- 894 Hanes, D.P., Schall, J.D., 1996. Neural control of voluntary movement initiation. *Science* 274, 427–  
895 430. <https://doi.org/10.1126/science.274.5286.427>
- 896 Harris, L.R., 1980. The superior colliculus and movements of the head and eyes in cats. *J Physiol* 300,  
897 367–391. <https://doi.org/10.1113/jphysiol.1980.sp013167>
- 898 Hikosaka, O., Takikawa, Y., Kawagoe, R., 2000. Role of the basal ganglia in the control of purposive  
899 saccadic eye movements. *Physiol Rev* 80, 953–978.  
900 <https://doi.org/10.1152/physrev.2000.80.3.953>
- 901 Hikosaka, O., Wurtz, R.H., 1985a. Modification of saccadic eye movements by GABA-related  
902 substances. I. Effect of muscimol and bicuculline in monkey superior colliculus. *J*  
903 *Neurophysiol* 53, 266–291. <https://doi.org/10.1152/jn.1985.53.1.266>
- 904 Hikosaka, O., Wurtz, R.H., 1985b. Modification of saccadic eye movements by GABA-related  
905 substances. II. Effects of muscimol in monkey substantia nigra pars reticulata. *J Neurophysiol*  
906 53, 292–308. <https://doi.org/10.1152/jn.1985.53.1.292>
- 907 Hikosaka, O., Wurtz, R.H., 1983. Effects on eye movements of a GABA agonist and antagonist  
908 injected into monkey superior colliculus. *Brain Res* 272, 368–372.  
909 [https://doi.org/10.1016/0006-8993\(83\)90586-3](https://doi.org/10.1016/0006-8993(83)90586-3)
- 910 Isa, T., Sasaki, S., 2002. Brainstem control of head movements during orienting; organization of the  
911 premotor circuits. *Prog Neurobiol* 66, 205–241. [https://doi.org/10.1016/s0301-0082\(02\)00006-0](https://doi.org/10.1016/s0301-0082(02)00006-0)
- 912
- 913 Kermadi, I., Joseph, J.P., 1995. Activity in the caudate nucleus of monkey during spatial sequencing.  
914 *J Neurophysiol* 74, 911–933. <https://doi.org/10.1152/jn.1995.74.3.911>
- 915 Kim, H.G., Connors, B.W., 1993. Apical dendrites of the neocortex: correlation between sodium- and  
916 calcium-dependent spiking and pyramidal cell morphology. *J Neurosci* 13, 5301–5311.
- 917 Knight, T.A., Fuchs, A.F., 2007. Contribution of the frontal eye field to gaze shifts in the head-  
918 unrestrained monkey: effects of microstimulation. *J Neurophysiol* 97, 618–634.  
919 <https://doi.org/10.1152/jn.00256.2006>
- 920 Lestienne, F., Vidal, P.P., Berthoz, A., 1984. Gaze changing behaviour in head restrained monkey.  
921 *Exp Brain Res* 53, 349–356. <https://doi.org/10.1007/BF00238165>
- 922 Martinez-Trujillo, J.C., Wang, H., Crawford, J.D., 2003. Electrical stimulation of the supplementary  
923 eye fields in the head-free macaque evokes kinematically normal gaze shifts. *J Neurophysiol*  
924 89, 2961–2974. <https://doi.org/10.1152/jn.01065.2002>
- 925 McPeck, R.M., Han, J.H., Keller, E.L., 2003. Competition between saccade goals in the superior  
926 colliculus produces saccade curvature. *J Neurophysiol* 89, 2577–2590.  
927 <https://doi.org/10.1152/jn.00657.2002>

- 928 McPeck, R.M., Skavenski, A.A., Nakayama, K., 2000. Concurrent processing of saccades in visual  
929 search. *Vision Res* 40, 2499–2516. [https://doi.org/10.1016/s0042-6989\(00\)00102-4](https://doi.org/10.1016/s0042-6989(00)00102-4)
- 930 Minken, A.W., Van Opstal, A.J., Van Gisbergen, J.A., 1993. Three-dimensional analysis of strongly  
931 curved saccades elicited by double-step stimuli. *Exp Brain Res* 93, 521–533.  
932 <https://doi.org/10.1007/BF00229367>
- 933 Monteon, J.A., Constantin, A.G., Wang, H., Martinez-Trujillo, J., Crawford, J.D., 2010. Electrical  
934 stimulation of the frontal eye fields in the head-free macaque evokes kinematically normal 3D  
935 gaze shifts. *J Neurophysiol* 104, 3462–3475. <https://doi.org/10.1152/jn.01032.2009>
- 936 Murthy, A., Ray, S., Shorter, S.M., Priddy, E.G., Schall, J.D., Thompson, K.G., 2007. Frontal eye  
937 field contributions to rapid corrective saccades. *J Neurophysiol* 97, 1457–1469.  
938 <https://doi.org/10.1152/jn.00433.2006>
- 939 Mushiake, H., Strick, P.L., 1995. Pallidal neuron activity during sequential arm movements. *J*  
940 *Neurophysiol* 74, 2754–2758. <https://doi.org/10.1152/jn.1995.74.6.2754>
- 941 Pashler, H., 1994. Dual-task interference in simple tasks: data and theory. *Psychol Bull* 116, 220–244.  
942 <https://doi.org/10.1037/0033-2909.116.2.220>
- 943 Pruszynski, J.A., King, G.L., Boisse, L., Scott, S.H., Flanagan, J.R., Munoz, D.P., 2010. Stimulus-  
944 locked responses on human arm muscles reveal a rapid neural pathway linking visual input to  
945 arm motor output. *Eur J Neurosci* 32, 1049–1057. <https://doi.org/10.1111/j.1460-9568.2010.07380.x>
- 946
- 947 Ramakrishnan, A., Chokhandre, S., Murthy, A., 2010. Voluntary Control of Multisaccade Gaze Shifts  
948 During Movement Preparation and Execution. *Journal of Neurophysiology* 103, 2400–2416.  
949 <https://doi.org/10.1152/jn.00843.2009>
- 950 Ray, S., Schall, J.D., Murthy, A., 2004. Programming of double-step saccade sequences: modulation  
951 by cognitive control. *Vision Res* 44, 2707–2718. <https://doi.org/10.1016/j.visres.2004.05.029>
- 952 Roucoux, A., Guitton, D., Crommelinck, M., 1980. Stimulation of the superior colliculus in the alert  
953 cat. II. Eye and head movements evoked when the head is unrestrained. *Exp Brain Res* 39,  
954 75–85. <https://doi.org/10.1007/BF00237071>
- 955 Rungta, S., Basu, D., Sendhilnathan, N., Murthy, A., 2021. Preparatory activity links the frontal eye  
956 field response with small amplitude motor unit recruitment of neck muscles during gaze  
957 planning. *J Neurophysiol* 126, 451–463. <https://doi.org/10.1152/jn.00141.2021>
- 958 Sayer, R.J., Friedlander, M.J., Redman, S.J., 1990. The time course and amplitude of EPSPs evoked at  
959 synapses between pairs of CA3/CA1 neurons in the hippocampal slice. *J Neurosci* 10, 826–  
960 836.
- 961 Sendhilnathan, N., Basu, D., Goldberg, M.E., Schall, J.D., Murthy, A., 2021. Neural correlates of  
962 goal-directed and non-goal-directed movements. *Proc Natl Acad Sci U S A* 118,  
963 e2006372118. <https://doi.org/10.1073/pnas.2006372118>
- 964 Sharika, K.M., Ramakrishnan, A., Murthy, A., 2008. Control of predictive error correction during a  
965 saccadic double-step task. *J Neurophysiol* 100, 2757–2770.  
966 <https://doi.org/10.1152/jn.90238.2008>
- 967 Stryker, M.P., Schiller, P.H., 1975. Eye and head movements evoked by electrical stimulation of  
968 monkey superior colliculus. *Exp Brain Res* 23, 103–112. <https://doi.org/10.1007/BF00238733>
- 969 Tu, T.A., Keating, E.G., 2000. Electrical Stimulation of the Frontal Eye Field in a Monkey Produces  
970 Combined Eye and Head Movements. *Journal of Neurophysiology* 84, 1103–1106.  
971 <https://doi.org/10.1152/jn.2000.84.2.1103>
- 972 Wood, D.K., Gu, C., Corneil, B.D., Gribble, P.L., Goodale, M.A., 2015. Transient visual responses  
973 reset the phase of low-frequency oscillations in the skeletomotor periphery. *Eur J Neurosci*  
974 42, 1919–1932. <https://doi.org/10.1111/ejn.12976>
- 975 Wu, E.X.W., Gilani, S.O., van Boxtel, J.J.A., Amihai, I., Chua, F.K., Yen, S.-C., 2013. Parallel  
976 programming of saccades during natural scene viewing: evidence from eye movement  
977 positions. *J Vis* 13, 17. <https://doi.org/10.1167/13.12.17>
- 978
- 979
- 980
- 981
